# Supplementary material for: Boosting ethylene yield via a synergistic 2D/0D nanostructured VCu layered double hydroxide/TiO2 catalyst in electrochemical CO2 reduction
Source: Royal Society of Chemistry journal article supplement (doi:10.1039/d4ya00417e), 2024-01-01
Supplement: d4ya00417e1.pdf [file d4ya00417e1.pdf]

## Supplementary Information

### **Boosting Ethylene Yield via Synergistic 2D/0D Nanostructured VCu Layered Double Hydroxide/TiO<sub>2</sub> Catalyst in Electrochemical CO<sub>2</sub> Reduction**

*Sneha S Lavate and Rohit Srivastava\**

Catalysis & Hydrogen Research Lab, Department of Petroleum Engineering,  
School of Energy Technology, Pandit Deendayal Energy University, Gandhinagar, Gujarat,  
India. 382426

E-mail of Corresponding Author: [rohit.s@spt.pdpu.ac.in](mailto:rohit.s@spt.pdpu.ac.in)

# Table of Contents

|                                                                   |    |
|-------------------------------------------------------------------|----|
| 1. ICP-OES.....                                                   | 3  |
| 1.1 Sample preparation for ICP for VCu LDH/TiO <sub>2</sub> ..... | 3  |
| 1.2 ICP data.....                                                 | 3  |
| 1.3 Electrode Preparation .....                                   | 5  |
| 2. Turnover Frequency (TOF).....                                  | 6  |
| 3. FESEM .....                                                    | 8  |
| 4. XRD .....                                                      | 9  |
| 5. Gas Chromatography Data.....                                   | 11 |
| 6. EDS with elemental mapping .....                               | 12 |
| 7. CO <sub>2</sub> RR product analysis .....                      | 14 |
| 8. FE calculations.....                                           | 15 |

## 1. ICP-OES

### 1.1 Sample preparation for ICP for VCu LDH/TiO<sub>2</sub>

4 mg of sample dissolved in 50 ml HNO<sub>3</sub>

200 µl out of 50 ml was taken and diluted in 25 ml H<sub>2</sub>O = 25000/200 times

4 mg of sample present in 50 ml

Therefore, 200 µl of sample contains =  $4 \times 200 / 50000 = 16 \mu\text{g}$

→ 2 ml of sample taken for analysis.

16 µg of catalyst present in 25 ml of sample

### 1.2 ICP data

V = 0.277 mg/L

Cu = 0.042 mg/L

Ti = 0.049 mg/L

For Vanadium,

1000 ml → 0.277 mg = 277 µg

25 ml =  $277 \times 25 / 1000 = 6.925 \mu\text{g}$  of V

For Copper,

1000 ml → 0.042 mg = 42 µg

25 ml =  $42 \times 25 / 1000 = 1.05 \mu\text{g}$  of Cu

For Titanium,

1000 ml → 0.049 mg = 49 µg

25 ml =  $49 \times 25 / 1000 = 1.225 \mu\text{g}$  of Ti

16 µg of sample contains

% of V =  $6.925 / 16 = 43.28 \text{ wt}\%$

% of Cu =  $1.05 / 16 = 6.56 \text{ wt}\%$

% of Ti =  $1.225 / 16 = 7.65 \text{ wt}\%$



### 1.3 Electrode Preparation

Slurry: 5 mg of sample + 1000  $\mu$ l IPA + 10  $\mu$ l Nafion

50  $\mu$ l solution dropcasted

Mass of catalyst

$$= 5000 * 50 / 1010$$

$$= 247 \mu\text{g}$$

$$\% \text{ of V} = 247 * 43.28\% = 10690 \mu\text{g}$$

Molecular weight of V = 51

$$51 \text{ g of V} = 1 \text{ mol V}$$

$$51 \mu\text{g of V} = 1 \mu\text{mol of V}$$

$$10690 \mu\text{g of V} = 10690 / 51 \mu\text{mol of V}$$

$$= 2.096 \times 10^{-4} \text{ mol of V}$$

$$\% \text{ of Cu} = 247 * 6.56\% = 37.65 \mu\text{g}$$

Molecular weight of Cu = 63.5

$$63.5 \text{ g of V} = 1 \text{ mol V}$$

$$63.5 \mu\text{g of V} = 1 \mu\text{mol of V}$$

$$37.65 \mu\text{g of Cu} = 37.65 / 63.5 \mu\text{mol of Cu}$$

$$= 5.9 \times 10^{-7} \text{ mol of Cu}$$

$$\% \text{ of Ti} = 247 * 7.65\% = 32.28 \mu\text{g}$$

Molecular weight of Ti = 204.3

$$204.3 \text{ g of V} = 1 \text{ mol V}$$

$$204.3 \mu\text{g of V} = 1 \mu\text{mol of V}$$

$$32.28 \mu\text{g of Cu} = 32.28 / 204.3 \mu\text{mol of Cu}$$

$$= 1.579 \times 10^{-7} \text{ mol of Ti}$$

## 2. Turnover Frequency (TOF)

Turn over frequency (TOF) was calculated for CO, CH<sub>4</sub> and C<sub>2</sub>H<sub>4</sub> using formula,

$$TOF = \frac{\left(\frac{j}{N \times F}\right)}{\left(\frac{m}{M}\right)} \quad (1)$$

Where,

$j$  = Partial current at given potential

$N$  = number of electrons transferred

$F$  = Faraday's number (96485 C/mol)

$m$  = Mass of metal sites present on the electrode

$M$  = Atomic mass of metals

' $m$ ' can be calculated as following Equation (2),

$$m = m_{cat} \times w \quad (2)$$

Where,  $m_{cat}$  is the mass of catalyst loaded (i.e. 247  $\mu$ g) and  $w$  is the content of metals obtained from ICP data (wt%)

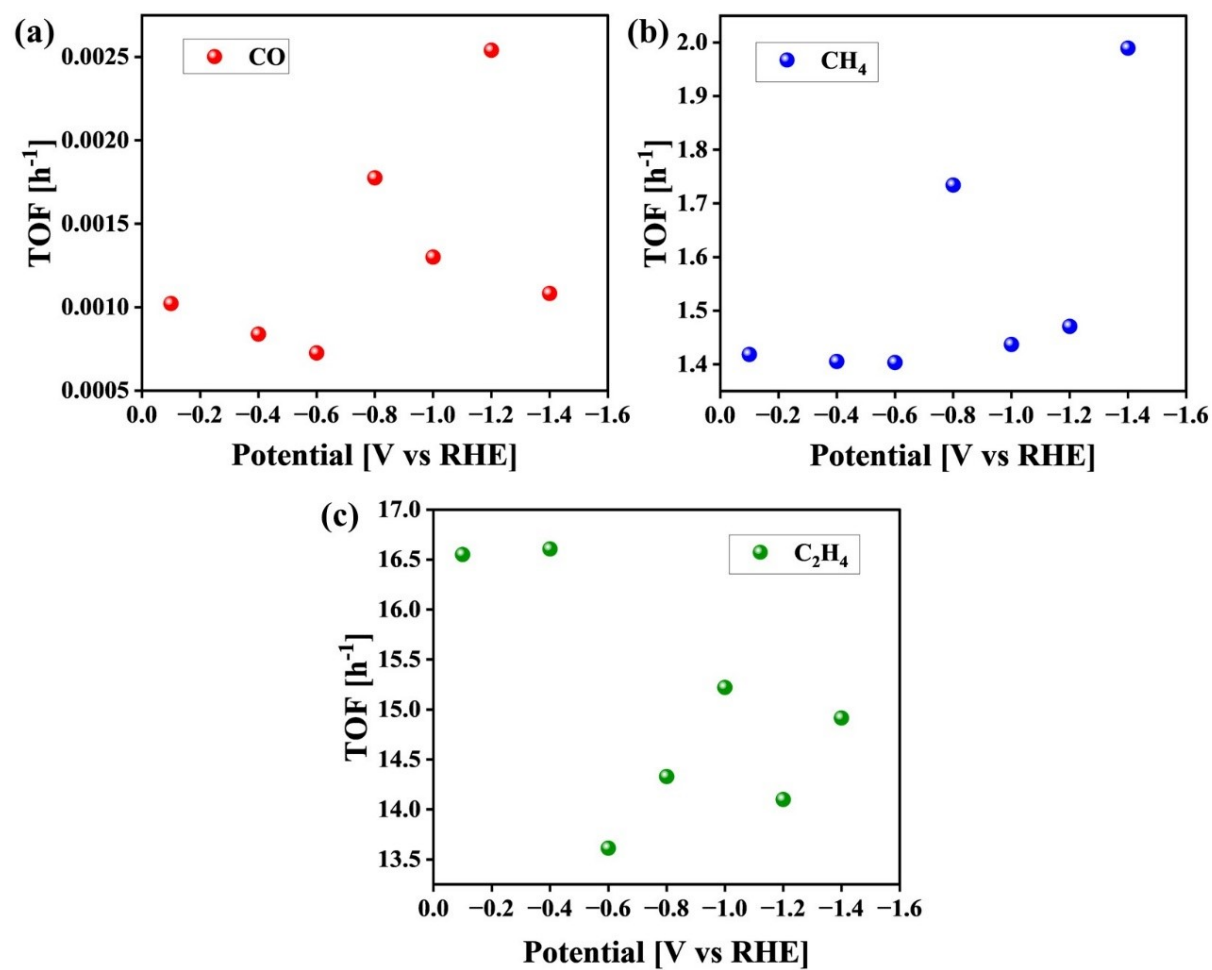

**Figure S 1:** TOF values of VCu LDH/TiO<sub>2</sub> for (a) CO, (b) CH<sub>4</sub> and (c) C<sub>2</sub>H<sub>4</sub> w.r.t. applied potential

### 3. FESEM

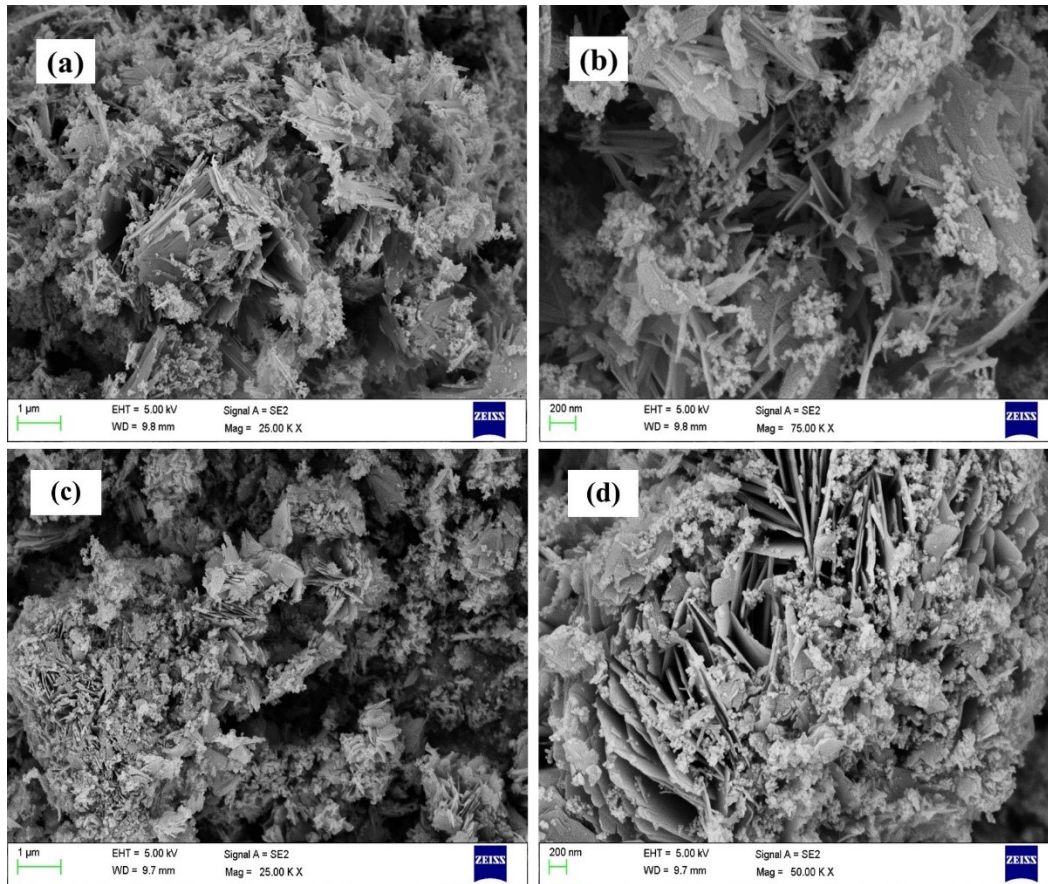

**Figure S 2:** FESEM images of VCu LDH/TiO<sub>2</sub> with reaction time of (a,b) 3 h and (c,d) 6 h



#### 4. XRD

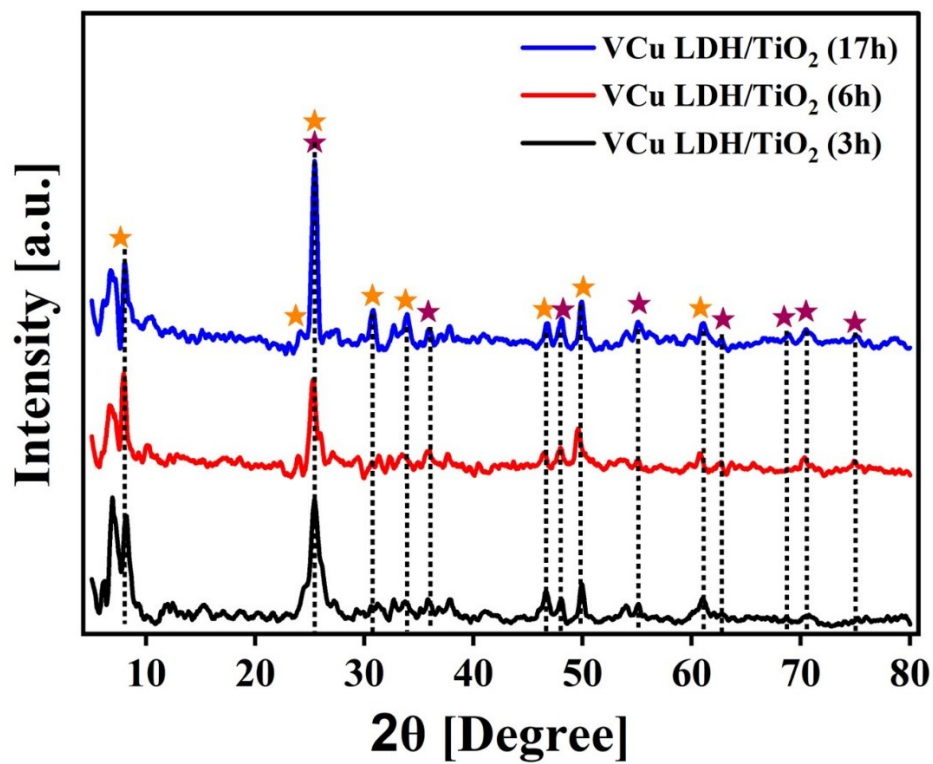

Figure S 3: XRD of VCu LDH/TiO<sub>2</sub> with reaction time of 3, 6 and 17 h

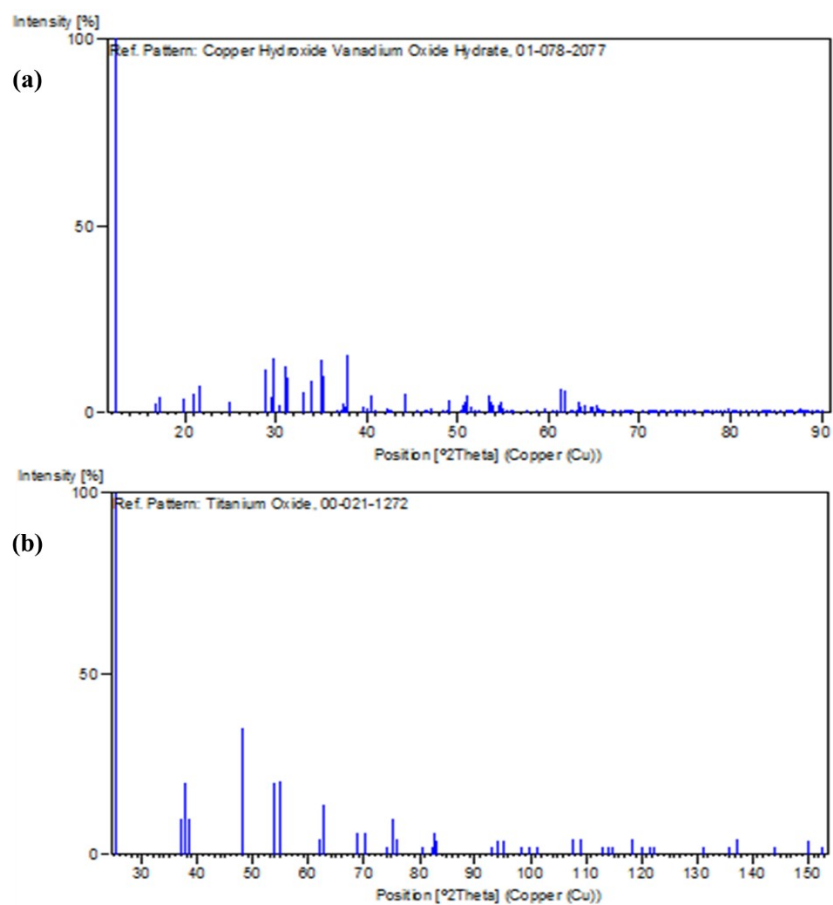

**Figure S 4:** XRD standard reference JCPDS cards of (a) VCu LDH, and (b) TiO<sub>2</sub>

## 5. Gas Chromatography Data

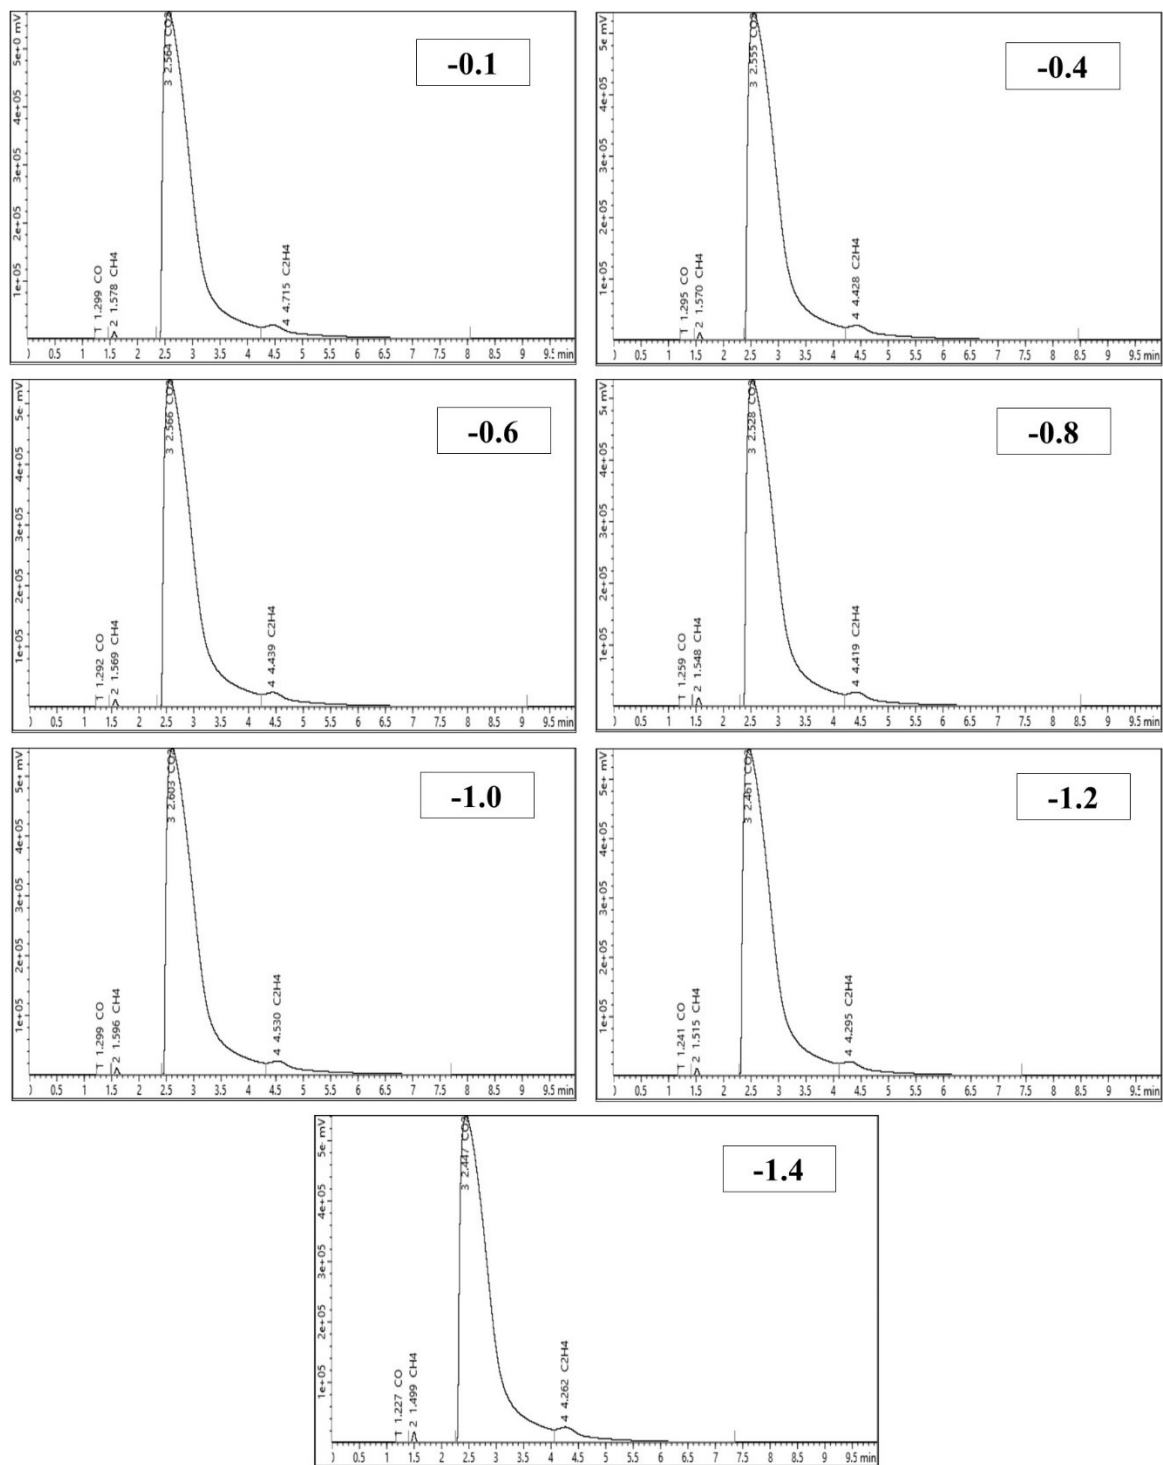

**Figure S 5:** Gas chromatography data (FID) obtained after chronoamperometry at different potentials (V vs RHE)

## 6. EDS with elemental mapping

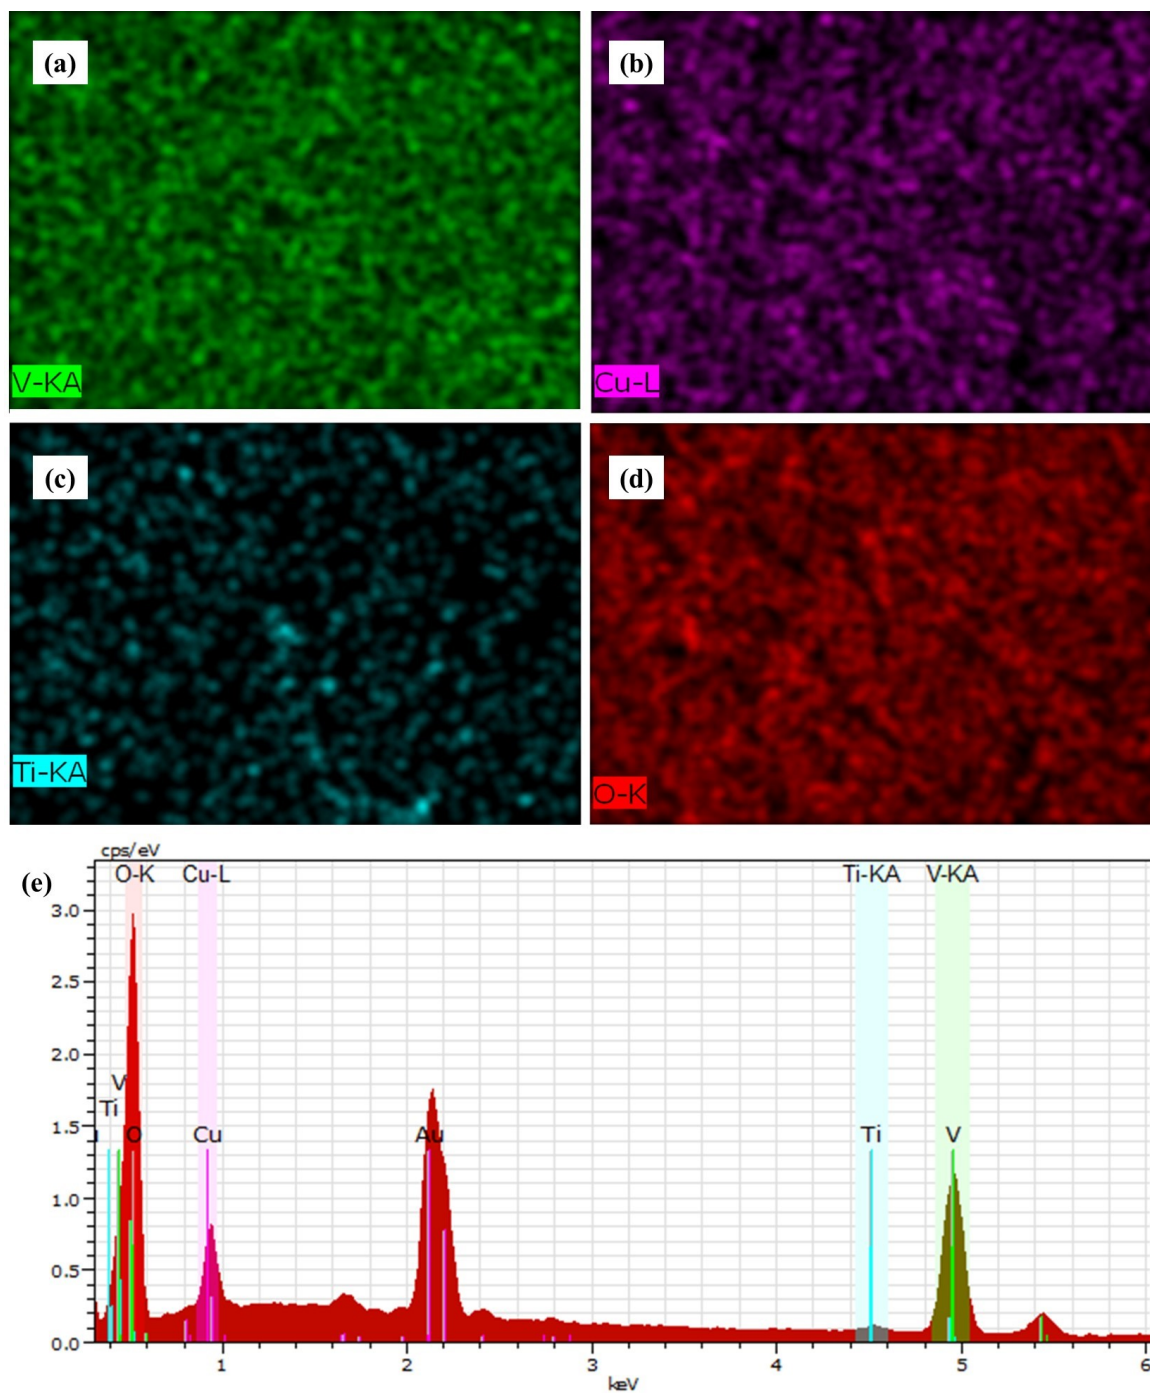

**Figure S 6:** Elemental mapping of (a) V, (b) Cu, (c) Ti and (d) O. Energy dispersive Spectroscopy graph for element distribution of VCu LDH/TiO<sub>2</sub>

| El     | AN | Series   | unn. C<br>[wt.%] | norm. C<br>[wt.%] | Atom. C<br>[at.%] | Error (1 Sigma)<br>[wt.%] |
|--------|----|----------|------------------|-------------------|-------------------|---------------------------|
| O      | 8  | K-series | 15.43            | 30.74             | 59.31             | 2.13                      |
| V      | 23 | K-series | 28.41            | 56.60             | 34.29             | 1.07                      |
| Cu     | 29 | L-series | 5.56             | 11.08             | 5.38              | 0.90                      |
| Ti     | 22 | K-series | 0.79             | 1.58              | 1.02              | 0.07                      |
| Total: |    |          | 50.20            | 100.00            | 100.00            |                           |

## 7. CO<sub>2</sub>RR product analysis

The same set of reaction (mentioned in the Section 6) has been carried to validate the activity of VCu LDH as shown in Figure S7 below.

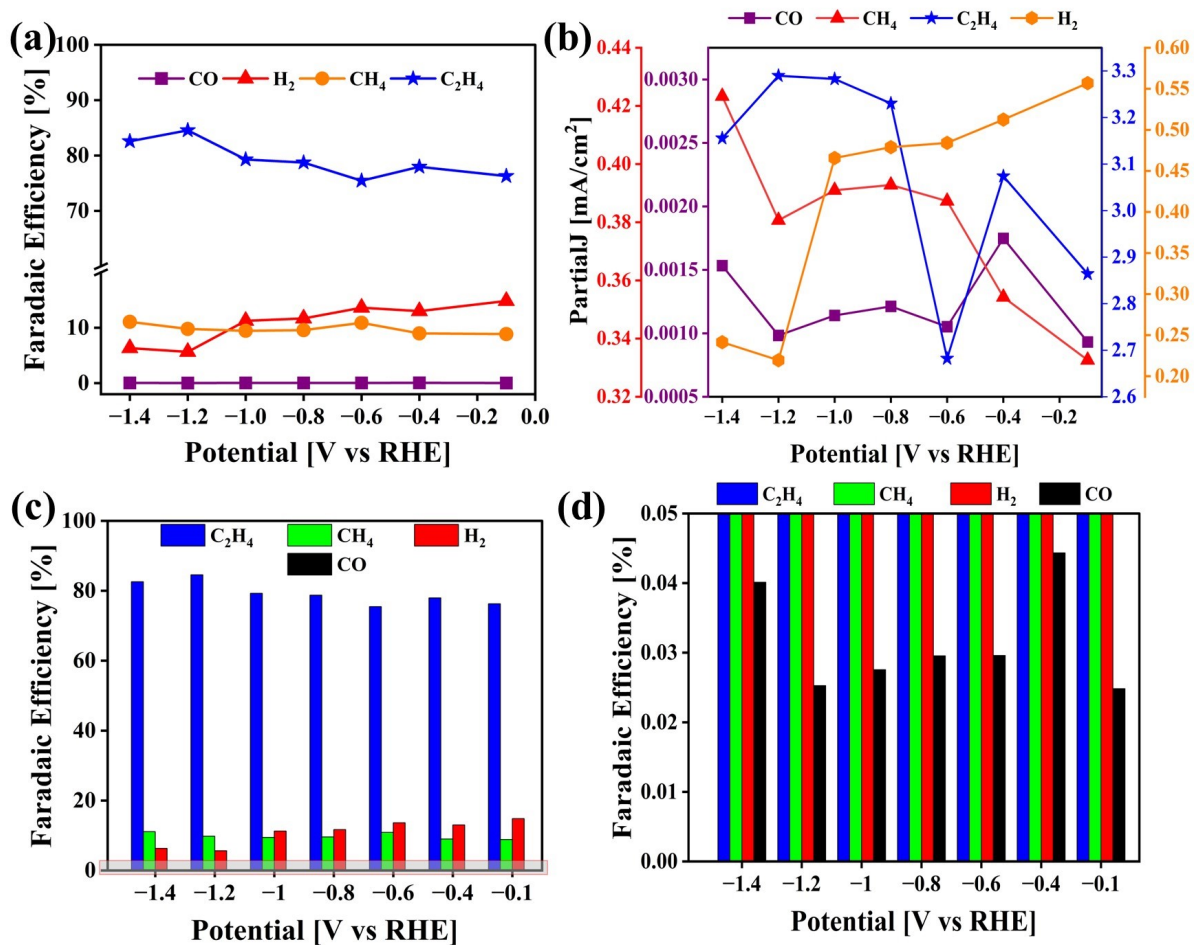

**Figure S 7:** Analysis of CO<sub>2</sub> reduction end products obtained using VCu LDH catalyst (a) Line + Symbol plot of FEs of CO, H<sub>2</sub>, CH<sub>4</sub> and C<sub>2</sub>H<sub>4</sub>, (b) Line + Symbol plot of Partial Current Densities of CO, H<sub>2</sub>, CH<sub>4</sub> and C<sub>2</sub>H<sub>4</sub>, (c) Bar plot of FEs and (d) Zoom in of (c) bar plot

## 8. FE calculations

Amount of CH<sub>4</sub> product = 'X' mol/L

Recorded current =  $2.16 \times 10^4$  A

Flow rate of CO<sub>2</sub> ( $\vartheta$ ) = 50 sccm

Number of electrons,  $n_i = 2$  for CO, 2 for H<sub>2</sub>, 8 for CH<sub>4</sub>, 12 for C<sub>2</sub>H<sub>4</sub>

$p_0 = 101.3$  kPa

Faraday constant = 96485 C/mol

Gas constant (R) = 8.314 J/mol.K

Partial current density and Faradaic Efficiency (FE) is calculated from the equation 3 and 4 as below,

$$j_i = x_i \times \vartheta \times \frac{n_i F p_0}{RT} \times (\text{electrode area})^{-1} \quad (3)$$

$$j_{i(\text{CO})} = 0.0012$$

$$j_{i(\text{CH}_4)} = 0.41$$

$$j_{i(\text{C}_2\text{H}_4)} = 3.22$$

$$j_{i(\text{H}_2)} = 0.22$$

The corresponding FE for each potential is calculated as,

$$FE = \frac{j_i}{j_{total}} \times 100 \% \quad (4)$$

$$FE_{(\text{CO})} = 0.030$$

$$FE_{(\text{CH}_4)} = 10.73$$

$$FE_{(\text{C}_2\text{H}_4)} = 83.49$$

$$FE_{(\text{H}_2)} = 5.74$$

**Table S 1:** Faradaic efficiency values of VCu LDH and VCu LDH/TiO<sub>2</sub>

| Potential<br>[V vs RHE] | Faradaic Efficiency [%] |         |                 |                               |                          |         |                 |                               |
|-------------------------|-------------------------|---------|-----------------|-------------------------------|--------------------------|---------|-----------------|-------------------------------|
|                         | VCu LDH                 |         |                 |                               | VCu LDH/TiO <sub>2</sub> |         |                 |                               |
|                         | H <sub>2</sub>          | CO      | CH <sub>4</sub> | C <sub>2</sub> H <sub>4</sub> | H <sub>2</sub>           | CO      | CH <sub>4</sub> | C <sub>2</sub> H <sub>4</sub> |
| -0.1                    | 14.832                  | 0.02482 | 8.85927         | 76.2839                       | 5.74512                  | 0.03094 | 10.7323         | 83.4917                       |
| -0.4                    | 13.0015                 | 0.04434 | 8.98567         | 77.9685                       | 5.1572                   | 0.02549 | 10.6794         | 84.1379                       |
| -0.6                    | 13.6189                 | 0.0296  | 10.8947         | 75.4568                       | 6.81481                  | 0.02581 | 12.4754         | 80.684                        |
| -0.8                    | 11.6704                 | 0.02954 | 9.57353         | 78.7265                       | 6.32047                  | 0.05889 | 14.3834         | 79.2372                       |
| -1                      | 11.2465                 | 0.02755 | 9.44286         | 79.2831                       | 6.65514                  | 0.0419  | 11.5735         | 81.7294                       |
| -1.2                    | 5.64137                 | 0.02526 | 9.78376         | 84.5496                       | 6.44835                  | 0.08735 | 12.6449         | 80.8194                       |
| -1.4                    | 6.31609                 | 0.04011 | 11.0761         | 82.5677                       | 6.13427                  | 0.03405 | 15.6431         | 78.1886                       |
